# Supplementary material
Source: publisher site journal article supplement (https://www.dovepress.com/article/supplementary_file/591097/591097%20Supplementary.docx)
Supplement: Supplementary file 1 [file 591097%20Supplementary.docx]

**Supplementary Table 1 |** **Estimated difference in change from baseline between participants with clinical response at month 3 vs. no clinical response at month 3, by QLQ-NMIBC24 domain and time point (Week 6 and Month 3)**

| **QLQ-NMIBC24 Domain** | **Week 6** | | | | | **Month 3** | | | | |
| --- | --- | --- | --- | --- | --- | --- | --- | --- | --- | --- |
| **N** | **Coeff.** | **SE** | **LB** | **UB** | **N** | **Coeff.** | **SE** | **LB** | **UB** |
| Urinary Symptoms | 232 | 5.04 | 2.25 | 0.61 | 9.47 | 223 | 0.39 | 2.19 | -3.92 | 4.70 |
| Malaise | 232 | -2.19 | 1.98 | -6.09 | 1.71 | 224 | -3.81 | 1.60 | -6.96 | -0.66 |
| Intravesical Treatment Issues | 232 | -2.95 | 2.83 | -8.53 | 2.63 | 223 | -2.66 | 2.80 | -8.17 | 2.85 |
| Future Worries | 232 | 0.71 | 2.61 | -4.44 | 5.86 | 224 | 2.70 | 3.13 | -3.47 | 8.87 |
| Bloating and Flatulence | 232 | -2.69 | 2.30 | -7.22 | 1.84 | 223 | 0.66 | 2.46 | -4.19 | 5.51 |
| Male Sexual Problems | 140 | -4.01 | 5.38 | -14.65 | 6.62 | 136 | -3.86 | 5.08 | -13.91 | 6.18 |
| Sexual Intimacy | 53 | -7.58 | 3.72 | -15.06 | -0.10 | 53 | -5.47 | 5.28 | -16.07 | 5.14 |
| Risk of Contaminating Partner | 53 | -2.50 | 6.19 | -14.94 | 9.93 | 54 | 3.33 | 5.49 | -7.70 | 14.36 |
| Female Sexual Problems | 7 | NA | NA | NA | NA | 9 | 3.92 | 5.96 | -10.67 | 18.51 |
| Sexual Function | 232 | 1.41 | 2.24 | -3.01 | 5.83 | 225 | 2.06 | 2.40 | -2.67 | 6.78 |
| Sexual Enjoyment | 53 | -4.30 | 6.79 | -17.94 | 9.33 | 53 | 0.88 | 7.70 | -14.60 | 16.35 |
| N = number of patients; Coeff = Coefficient of clinical response indicator in ANCOVA's underlying regression model; SE = Standard error; LB = Lower 95% confidence interval (CI) bound; UB = Upper 95% CI bound. | | | | | | | | | | |
